# Supplementary material for: Elasto-Inertial Focusing Mechanisms of Particles in Shear-Thinning Viscoelastic Fluid in Rectangular Microchannels
Source: MDPI journal article supplement (doi:10.3390/mi13122131), 2022-12-01
Supplement: s1 [file s1]

## **Supplementary Information**

### **Elasto-Inertial Focusing Mechanisms of Particles in Shear-Thinning Viscoelastic Fluid in Rectangular Microchannels**

Mohammad Moein Naderi, Ludovica Barilla, Jian Zhou, Ian Papautsky\*, Zhangli Peng\*

University of Illinois Chicago, Department of Biomedical Engineering, Chicago, IL, 60607, USA

\*Address correspondence to:

Dr. Ian Papautsky  
Department of Biomedical Engineering  
851 S. Morgan Street, 218 SEO  
University of Illinois Chicago  
Chicago, IL 60607, USA  
E-mail: papauts@uic.edu; Tel: +1.312.413.3800

Dr. Zhangli Peng  
Department of Biomedical Engineering  
851 S. Morgan Street, 218 SEO  
University of Illinois Chicago  
Chicago, IL 60607, USA  
E-mail: zhpeng@uic.edu; Tel: +1.312.996.8467

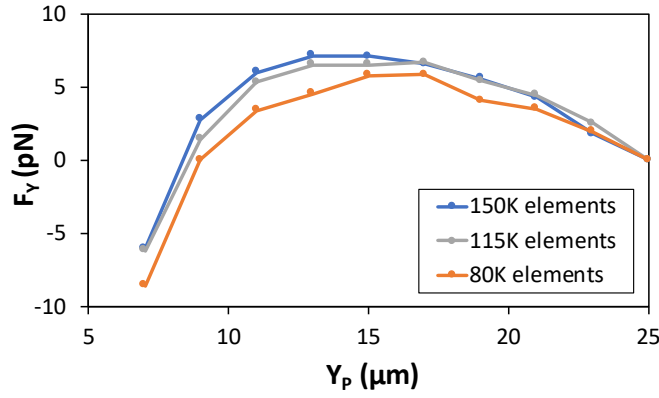

**Fig S1. Mesh independence test results.** Lateral force curves along the Y-midline at  $Q = 1\mu\text{L}/\text{min}$  for 80,000, 115,000, and 150,000 domain mesh elements.

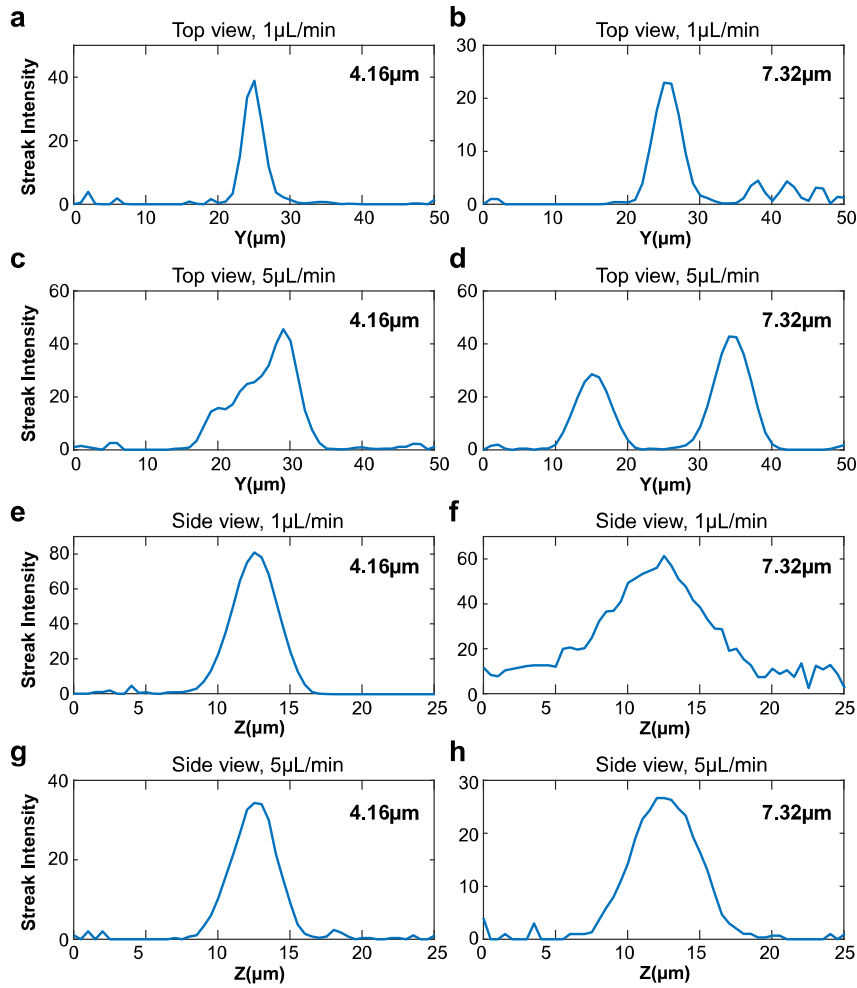

**Fig S2. Line scan data of the fluorescent intensity of the focused streams for the  $4.16\mu\text{m}$  and  $7.32\mu\text{m}$  particles at (a,b)  $1\mu\text{L}/\text{min}$ , top view, (c,d)  $5\mu\text{L}/\text{min}$ , top view, (e,f)  $1\mu\text{L}/\text{min}$ , side view, (g,h)  $5\mu\text{L}/\text{min}$ , side view**

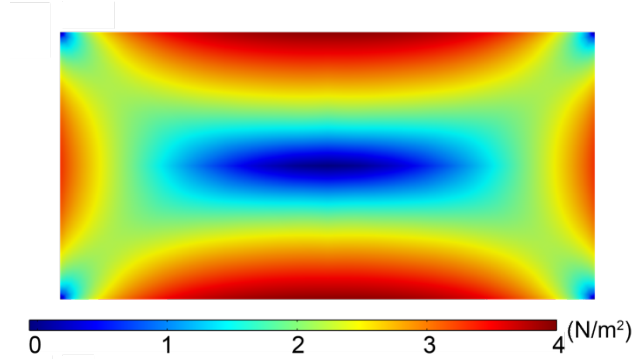

**Fig S3.** Simulation result of the first normal stress difference ( $N_1$ ) at  $Q = 1 \mu\text{L}/\text{min}$ . ( $Re = 0.2$ ,  $Wi = 3.6$ ,  $El = 18$ ). Only a quarter of the channel is simulated due to symmetry and the results are mirrored about both axes of symmetry.

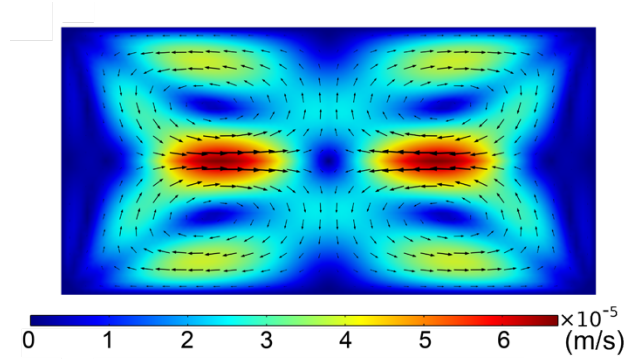

**Fig S4.** Simulation result of the magnitude and direction of the  $N_2$ -induced secondary flow at  $Q = 1 \mu\text{L}/\text{min}$ . ( $Re = 0.2$ ,  $Wi = 3.6$ ,  $El = 18$ ). Only a quarter of the channel is simulated due to symmetry and the results are mirrored about both axes of symmetry.

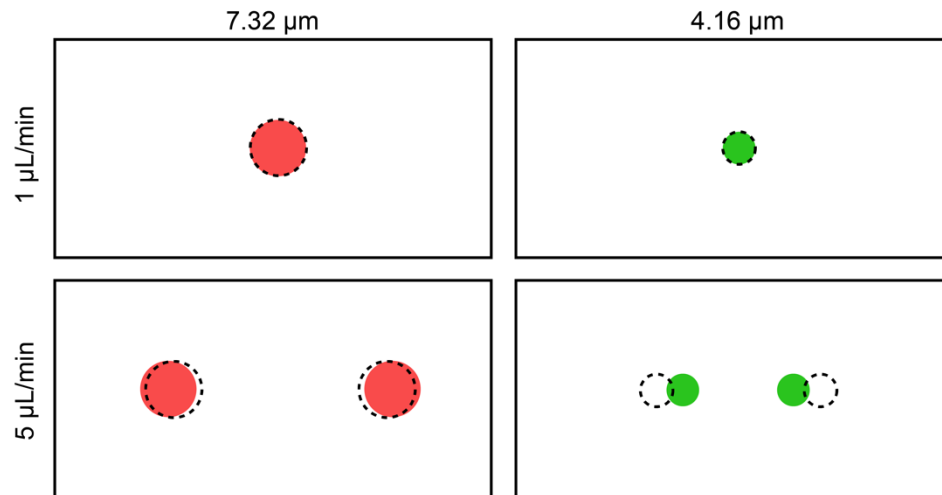

**Fig S5.** Channel cross-section schematic comparing the experimental (colored circles) observations and the simulation results (dashed circles) for the focusing position of  $4.16 \mu\text{m}$  and  $7.32 \mu\text{m}$  particles at  $1 \mu\text{L}/\text{min}$  and  $5 \mu\text{L}/\text{min}$ . At  $1 \mu\text{L}/\text{min}$ , simulation results predict the

focusing positions perfectly. At 5 $\mu$ L/min, the overall behavior of both particle sizes in the simulations is in agreement with the experiments. However, predicted focusing position for the 7.32 $\mu$ m particle is 1 $\mu$ m closer to the center, and the simulated focusing position for the 4.16 $\mu$ m particles is 4 $\mu$ m closer to the side walls.
